# Supplementary material for: Assembly of a two-dimensional oxalate-bridged heterometallic CoII3CrIII2 coordination polymer
Source: Royal Society of Chemistry journal article supplement (doi:10.1039/b800659h), 2008-01-01
Supplement: b800659h.pdf [file b800659h.pdf]

## Supplementary materials

Assembly of a two-dimensional oxalate-bridged heterometallic

$\text{Co}^{\text{II}}_3\text{Cr}^{\text{III}}_2$  coordination polymer

**Hui-Zhong Kou, Jun Tao, Osamu Sato**

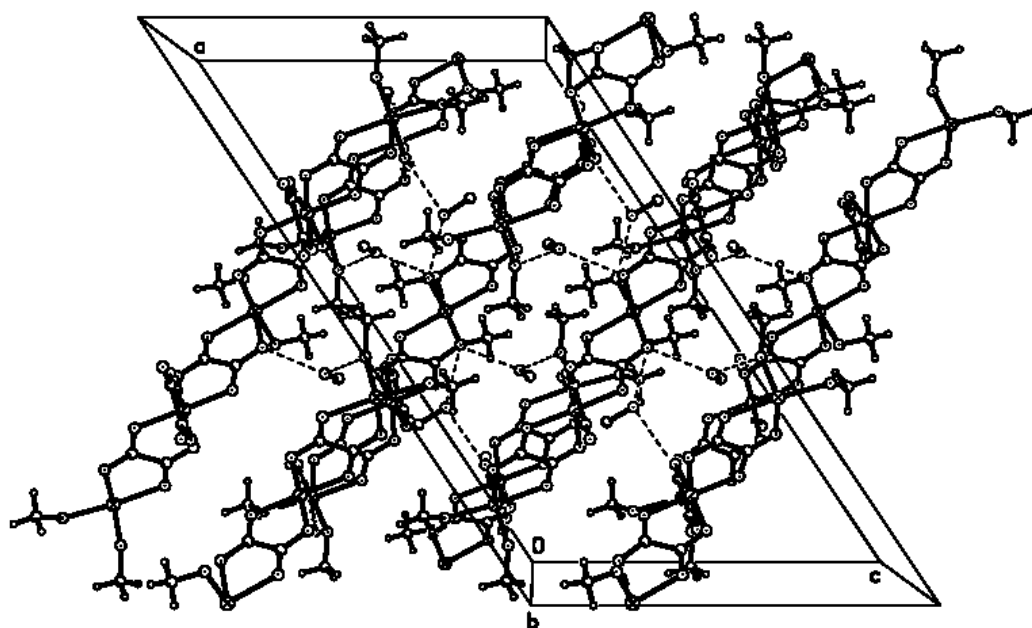

S1 Cell packing diagram along the b axis showing the planar layers in **1**.

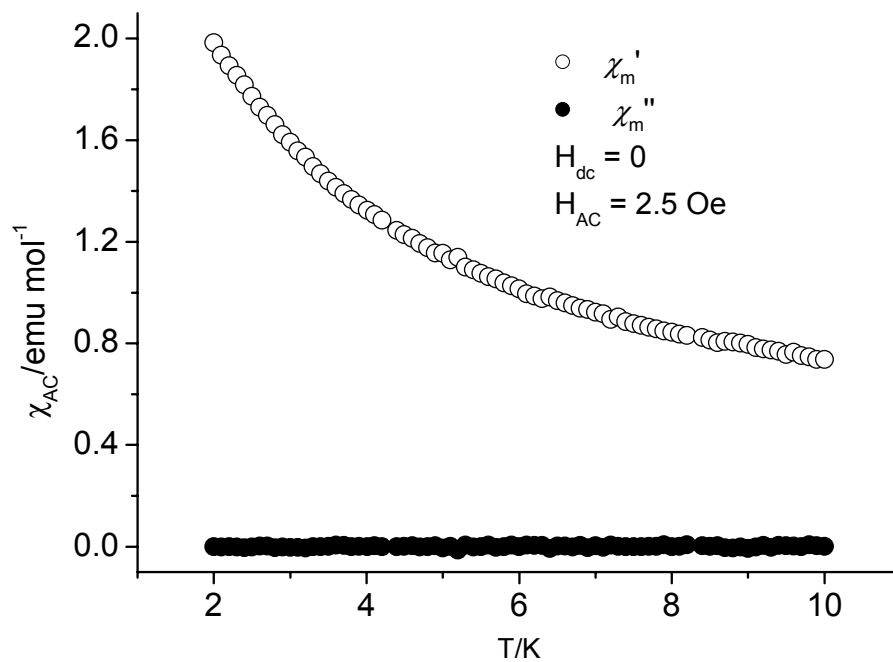

S2 Zero-static AC magnetic susceptibility under an AC magnetic field of 2.5 Oe for **1**.

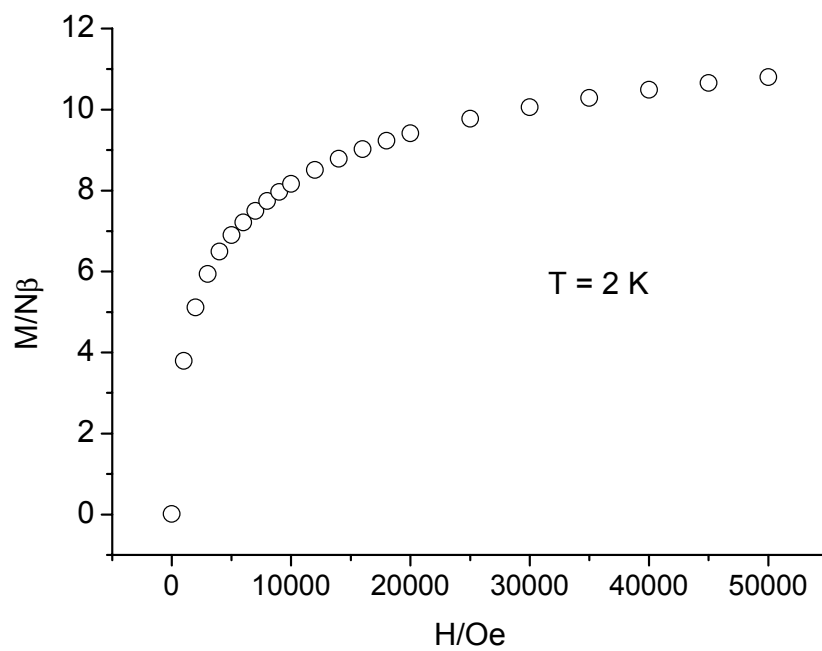

**S3** Magnetisation curve at 2 K for **1**.

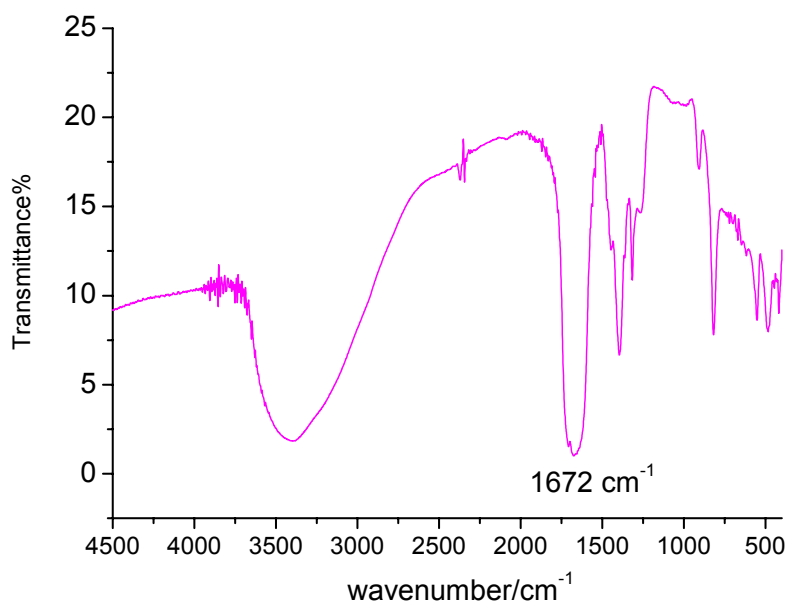

**S4** IR spectrum of **1**.
